# Supplementary material for: Expression of E-Cadherin in Epithelial Cancer Cells Increases Cell Motility and Directionality through the Localization of ZO-1 during Collective Cell Migration
Source: MDPI journal article supplement (doi:10.3390/bioengineering8050065), 2021-05-11
Supplement: s1 [file s1]

## Supplementary Materials

### Expression of E-cadherin in epithelial cancer cells increases cell motility and directionality through the localization of ZO-1 during collective cell migration

Song Yi Park<sup>1†</sup>, Hwanseok Jang<sup>2†</sup>, Seon Young Kim<sup>1</sup>, Dasarang Kim<sup>1</sup>, Yongdoo Park<sup>2\*</sup> and Sun-Ho Kee<sup>1\*</sup>

<sup>1</sup>Department of Microbiology, College of Medicine, Korea University, Seoul, Korea

<sup>2</sup>Department of Biomedical Sciences, College of Medicine, Korea University, Seoul, Korea

<sup>†</sup> Authors contributed equally to this work.

\*Corresponding authors: Yongdoo Park and Sun-Ho Kee

E-mail: ydpark67@korea.ac.kr; keesh@korea.ac.kr

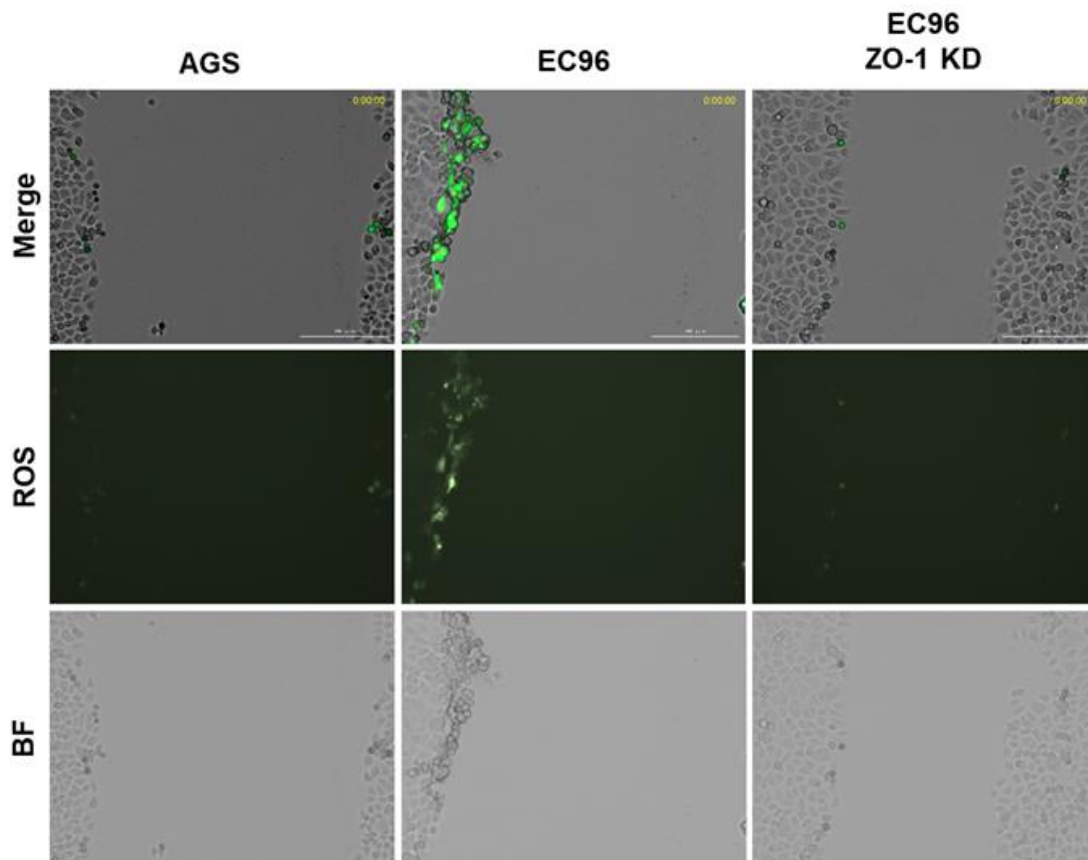

**Figure S1.** Detection of ROS in migrating cells. Intracellular ROS levels were also observed by live cell imager (magnification,  $\times 100$ ). The green fluorescence of DCF represents the levels of intracellular ROS.

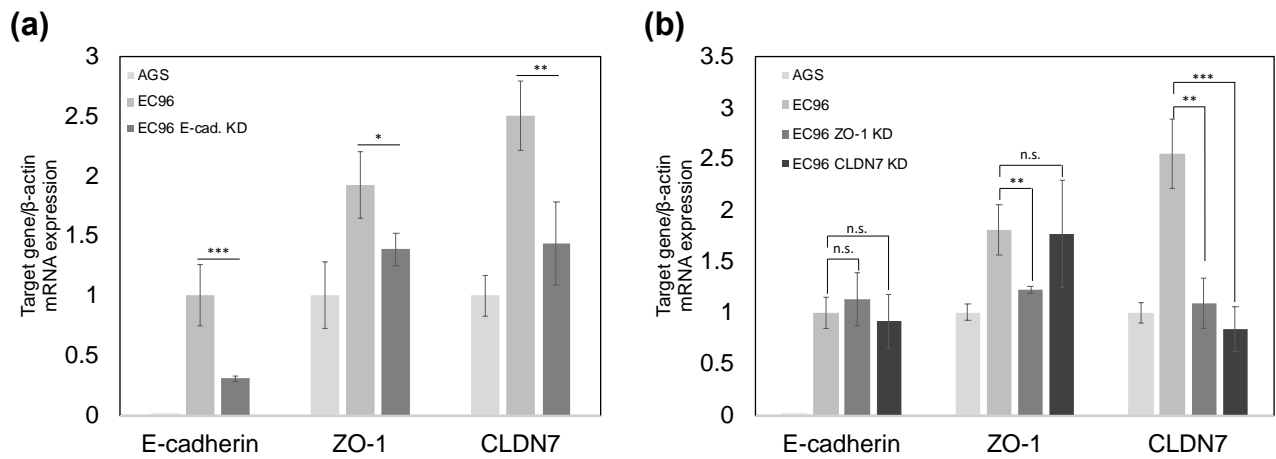

**Figure S2.** Re-expression of E-cadherin regulates ZO-1 and CLDN7 expression. (a) Total RNA extracted from AGS, EC96 and EC96 E-cad. KD cells were subjected to RT-PCR with E-cadherin, ZO-1 and CLDN7-specific primers. (b) Total RNA extracted from AGS, EC96, EC96 ZO-1 KD and EC96 CLDN7 KD cells were subjected to RT-PCR with E-cadherin, ZO-1 and CLDN7-specific primers. Averages of three independent experiments with error bars are presented. \*P<0.05; \*\*P<0.01; \*\*\*P<0.001; n.s., not significant.

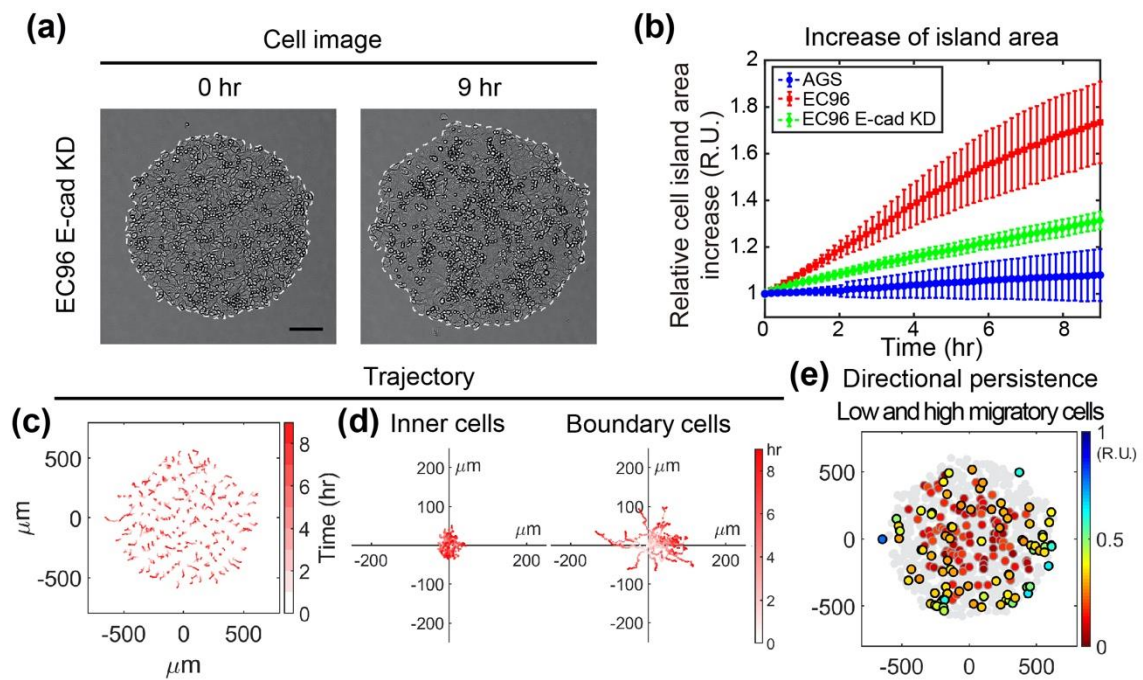

**Figure S3.** Analysis of motility and directionality of cell islands composed of E-cadherin knockdown cell line and comparison with AGS and EC96. (a) Images of E-cadherin KD cell islands at 0 hr and 9 hr after release (scale bar = 200 μm). (b) Relative area increase of cell islands composed of the AGS, EC96 and E-cadherin KD cells over time (n = 5). (c) Trajectory of the cells within the E-cadherin KD cell island. (d) Trajectory from the initial locations of the inner and boundary cells within the E-cadherin KD cell island. (e) Color-code map of the directional persistence of the lowest 25% and the highest 25% of motile cells within the E-cadherin KD cell island. Gray circles represent mid-quartile (25 – 75%) motile cells within each group population.

**Table S1.** Forward and reverse primers for real-time quantitative RT-PCR

| Gene           | Forward primer             | Reverse primer                  |
|----------------|----------------------------|---------------------------------|
| E-cadherin     | ACC ATT AAC AGG AAC ACA GG | CAG TCA CTT TCA GTG TGG TG      |
| ZO-1           | TGC CAT TAC ACG GTC CTC TG | GGT TCT GCC TCATTT CCT C        |
| CLDN1          | TTC TCG CCT TCC TGG GAT G  | CTT GAA CGA TTC TAT TGC CAT ACC |
| CLDN7          | TGA GAG CAA GGC TGG GTA C  | TGG GAA TGAATG TCG AGA TAC G    |
| $\beta$ -actin | ATC TAC GAG GGG TAT GCC    | TAG CTC TTC TCC AGG GAG         |

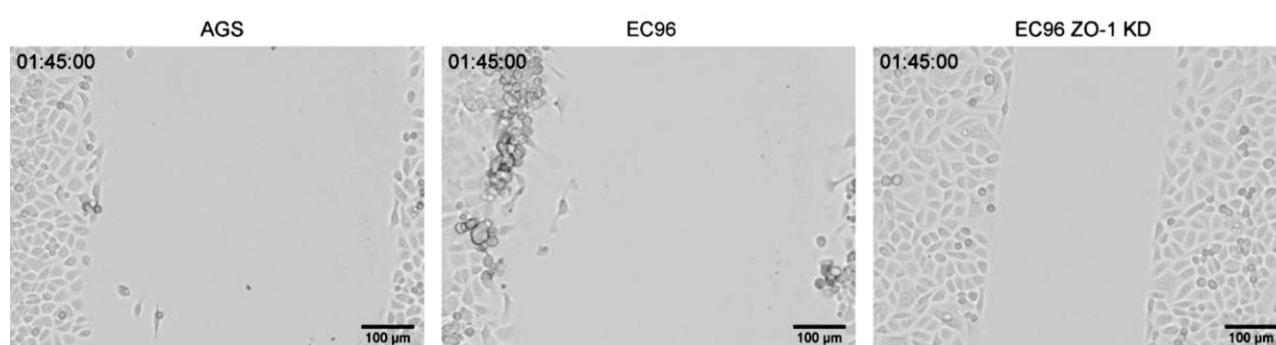

**Vides S1.** Time-lapse microscopy of cell migration
